# Supplementary material
Source: PubMed Central journal article supplement (PMC4821366)
Supplement: NIHMS67426-supplement-S2.pdf [file NIHMS67426-supplement-S2.pdf]

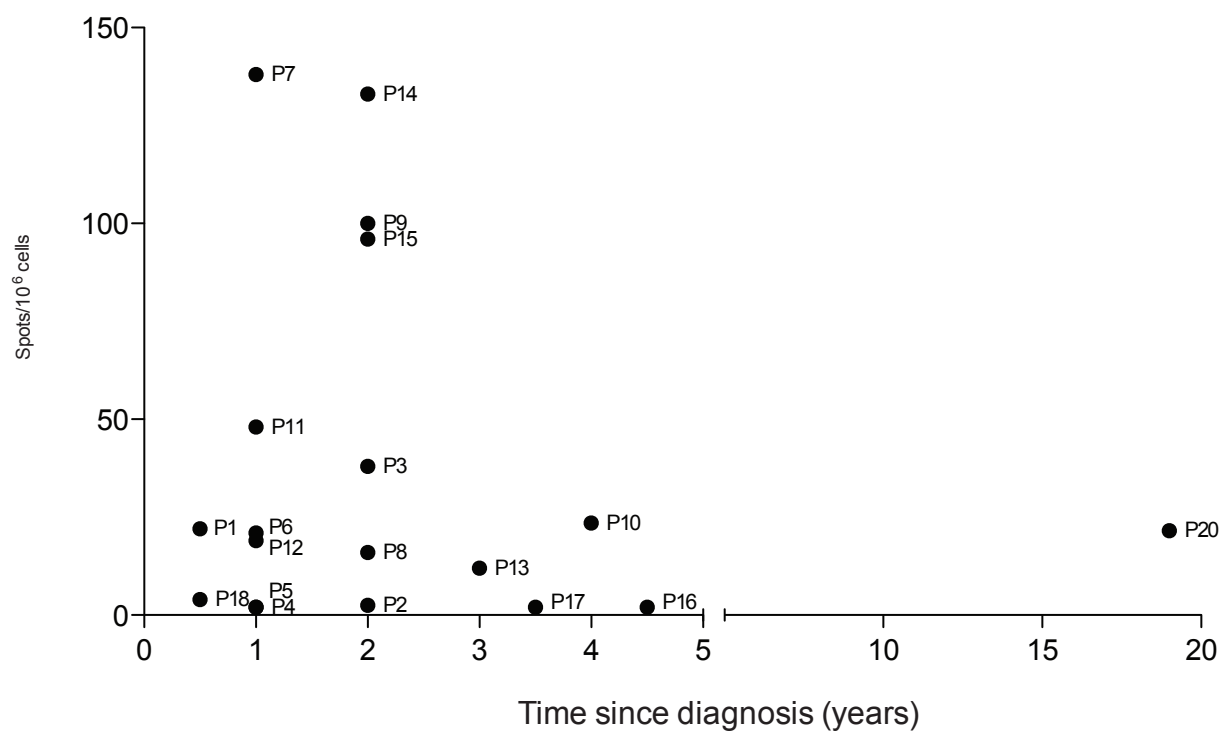

**Supplementary Figure S2: Ex-vivo 21-OH specific T cell responses can be identified for many years after diagnosis in the peripheral blood of Addison's disease patients.** 21-OH specific T cell responses were analyzed from PBMC in ex-vivo assays against the pool of the 21-OH peptides at different time points after diagnosis in Addison's Disease patients. Each symbol represents a different patient, corresponding to the order shown in Table 1.
