# Supplementary material
Source: PubMed Central journal article supplement (PMC4821366)
Supplement: NIHMS67426-supplement-S3.pdf [file NIHMS67426-supplement-S3.pdf]

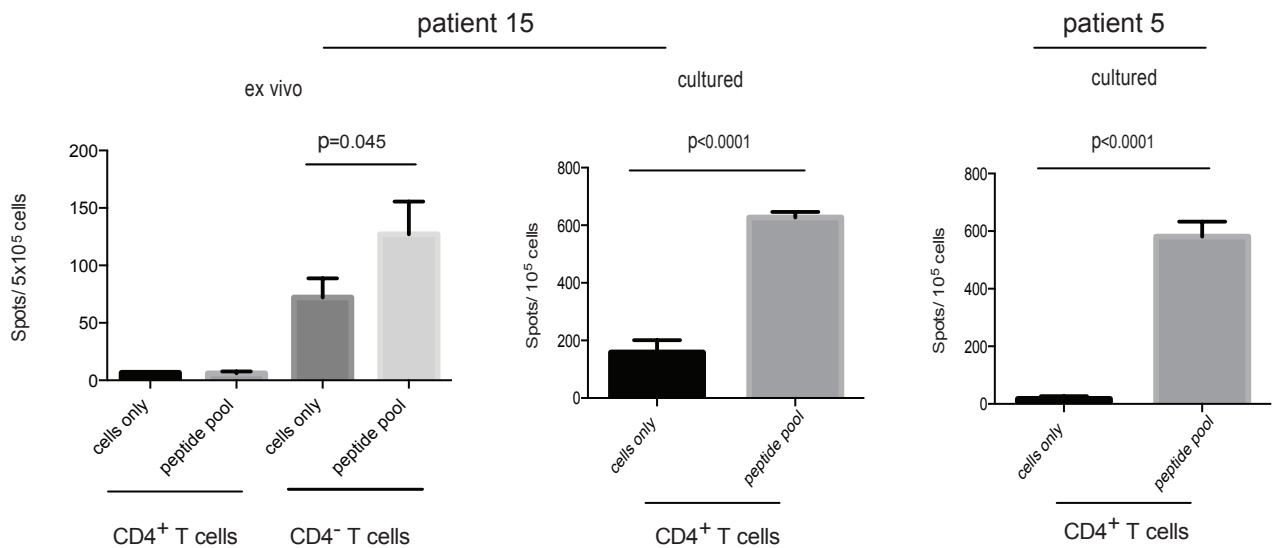

**Supplementary Figure S3: Ex-vivo and cultured ELISPOT from CD4+ and CD4- T cells.**

21-OH specific T cell responses were analyzed from sorted CD4+ and CD4- T cells purified from PBMC of patient 5 and patient 15 and tested either in ex-vivo assays (ex vivo) or after culture for 2 weeks with the pool of the 21-OH peptides (cultured). ELISPOT assays were performed against the pool of the 21-OH peptides. Background responses in the absence of peptides are shown (cells only).
