# Supplementary material
Source: PubMed Central journal article supplement (PMC4821366)
Supplement: NIHMS67426-supplement-S4.pdf [file NIHMS67426-supplement-S4.pdf]

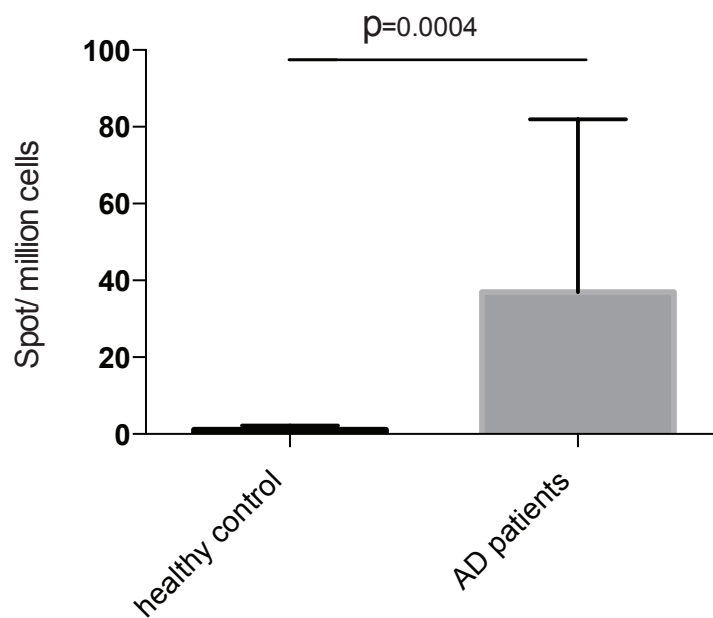

**Supplementary Figure S4: Cumulative ex-vivo ELISPOT data from PBMC from Addison's patients and healthy controls.** 21-OH specific T cell responses were analyzed from PBMC from sorted CD4<sup>+</sup> and CD4<sup>-</sup> T cells purified from PBMC from Addison's patients and healthy controls tested against the pool of the 21-OH peptides.
