# Supplementary material
Source: PubMed Central journal article supplement (PMC4821366)
Supplement: NIHMS67426-supplement-S5.pdf [file NIHMS67426-supplement-S5.pdf]

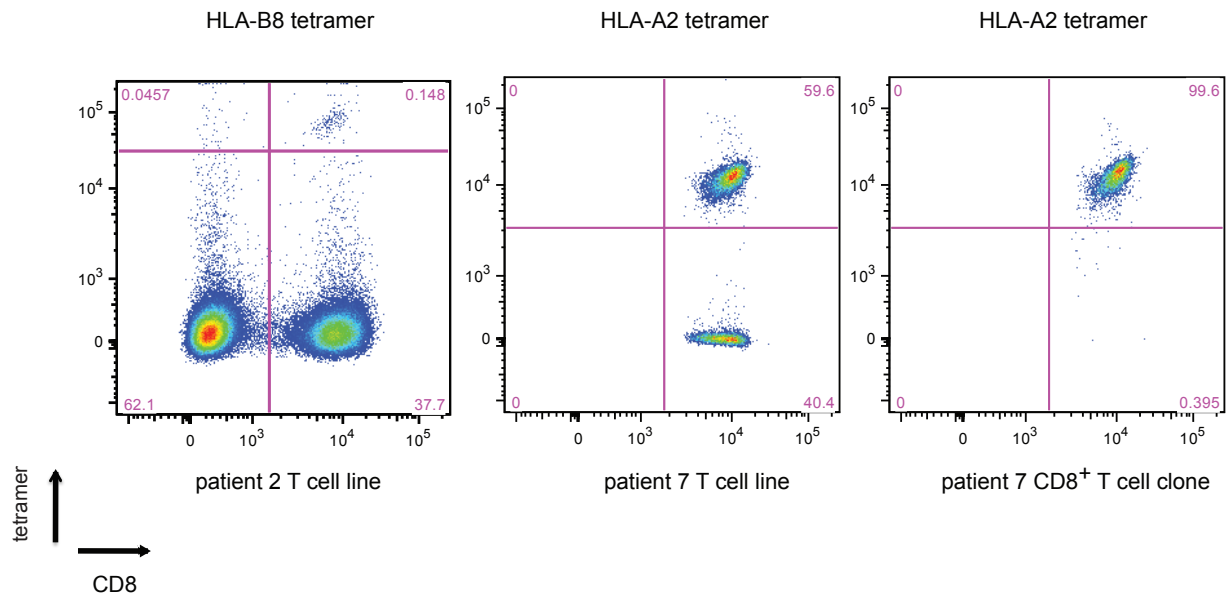

**Supplementary Figure S5: HLA tetramer staining of 21-OH specific T cell clones and lines.** Staining of HLA B8 restricted T cell line from patient 2 with HLA B8 tetramers loaded 428-435 21-OH peptide (left panel) and of HLA A2 restricted T cell line (middle panel) and clone (right panel) with HLA A2 tetramers loaded with 342-350 21-OH peptide.
