# Supplementary material
Source: PubMed Central journal article supplement (PMC4821366)
Supplement: NIHMS67426-supplement-S6.pdf [file NIHMS67426-supplement-S6.pdf]

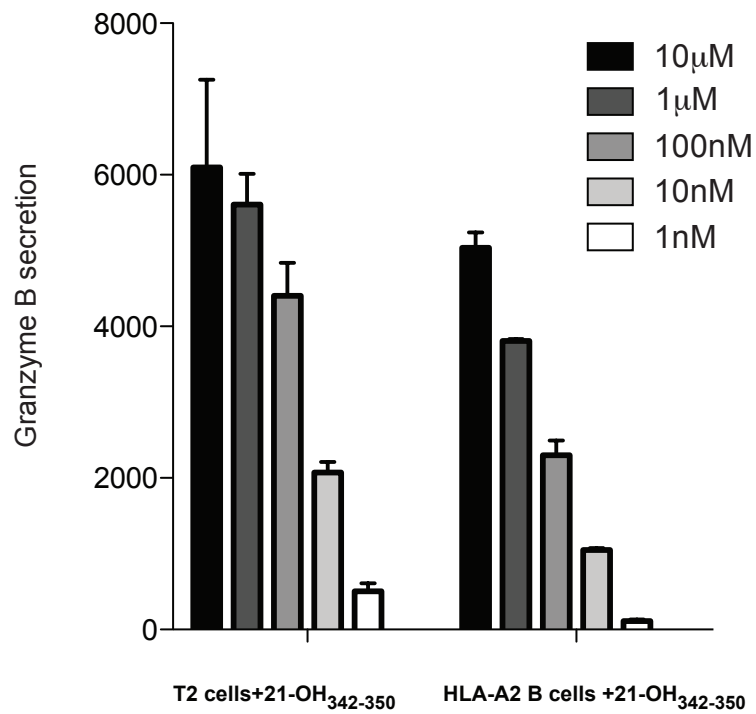

**Supplementary Figure S6: 21-OH337-354 specific CD8+ T cell clone recognizes target cells pulsed with nanomolar peptide concentrations.** ELISA with anti granzyme B specific Ab from supernatant of 21-OH specific CD8+ T cell clone shown in Fig. S5 tested against T2 (left panel) or HLA-A2 B cells (right panel) pulsed with indicated concentrations of the 342-350 21-OH peptide.
