# Supplementary material
Source: PubMed Central journal article supplement (PMC4821366)
Supplement: NIHMS67426-supplement-Table_S1.pdf [file NIHMS67426-supplement-Table_S1.pdf]

Table S1: Sequence of 21-OH peptides used for T cell stimulation

| Peptide number | Position | Sequence            |
|----------------|----------|---------------------|
| 1              | 1-18     | MLLLGLLLLLPLLAGARLL |
| 2              | 14-30    | GARLLWNWKLRSLSHLPP  |
| 3              | 26-43    | LHLPPLAPGFLHLLQPD   |
| 4              | 39-56    | LQPDLP IYLLGLTQKFGP |
| 5              | 52-69    | QKFGPIYRLHLGLQDVVV  |
| 6              | 65-82    | QDVVVLNSKRTIEEAMVK  |
| 7              | 78-95    | EAMVKKWADFAGRPEPLT  |
| 8              | 91-108   | PEPLTYKLVSKNYPDL    |
| 9              | 104-121  | PDLSLGDYSLLWKAHKKL  |
| 10             | 117-134  | AHKKLTRSALLLGIRDSM  |
| 11             | 130-147  | IRDSMEPVVEQLTQEFCE  |
| 12             | 143-160  | QEFCEMRAQPGRPVAIE   |
| 13             | 156-173  | PVAIEEEFSLTCSIIICY  |
| 14             | 169-186  | SIICYLTFGDKIKDDNLM  |
| 15             | 182-199  | DDNLMPAYYKCIQEVLKT  |
| 16             | 195-211  | EVLKTWSHWSIQIDVIP   |
| 17             | 207-224  | IDVIPFLRFFPNPGLRRL  |
| 18             | 220-237  | GLRRLKQAIEKRDHIVEM  |
| 19             | 233-250  | HIVEMQLRQHKEVSLVAGQ |
| 20             | 246-263  | LVAGQWRDMDYMLQGV    |
| 21             | 259-276  | LOGVAQPSMEEGSGOLLE  |
| 22             | 272-289  | GOLLEGHVHMAAVDLLIG  |
| 23             | 285-302  | DLLIGGTETTANTLSWAV  |
| 24             | 298-315  | LSWAVVFLHHPHPEIQORL |
| 25             | 311-328  | IQORLQEELDHELPGAS   |
| 26             | 324-341  | GPGASSSRVPYKDRARLP  |
| 27             | 337-354  | RARLPLLNATIAEVLRLR  |
| 28             | 350-367  | VLRLRPVVPLALPHRTTR  |
| 29             | 363-380  | HRTTRPSSISGYDIPEGT  |
| 30             | 376-393  | IPEGTVIIPNLQGAHLDE  |
| 31             | 389-406  | AHLDETVWERPHEFWPDR  |
| 32             | 402-419  | FWPDRFLEPGKNSRALAF  |
| 33             | 415-432  | RALAFGCGARVCLGEPLA  |
| 34             | 427-444  | GEPLARLELFVVLTRLLQ  |
| 35             | 441-458  | TRLLQAFTLLPSGDALPS  |
| 36             | 454-471  | DALPSLQPLPHCSVILKM  |
| 37             | 467-484  | VILKMQPFQVRLQPRGMG  |
| 38             | 480-492  | PRGMGAHSPGONQ       |
